# Supplementary material for: Application of fractal models to delineate mineralized zones in the Pulang porphyry copper deposit, Yunnan, Southwest China
Source: Copernicus journal article supplement (doi:10.5194/npg-2019-8), 2019-03-27
Supplement: Supplementary file [file npg-2019-8-AC1-supplement.pdf]

1 Application of fractal models to delineate mineralized zones in  
2 the Pulang porphyry copper deposit, Yunnan, Southwest China

3 Xiaochen Wang<sup>a</sup>, Qinglin Xia<sup>a,b,\*</sup>, Tongfei Li<sup>a</sup>, Shuai Leng<sup>a</sup>, Yanling Li<sup>a</sup>,  
4 Li Kang<sup>a</sup>, Zhijun Chen<sup>a</sup>, Lianrong Wu<sup>c</sup>

5 <sup>a</sup> Faculty of Earth Resources, China University of Geosciences, Wuhan 430074, China

6 <sup>b</sup> Collaborative Innovation Center for Exploration of Strategic Mineral Resources,  
7 Wuhan 430074, China

8 <sup>c</sup> Yunnan Diqing Nonferrous Metal Co., Ltd., Shangri-La 674400, China

9 **Abstract**

10 The purpose of this study is to delineate various mineralized zones and the  
11 barren host rocks based on the surface and subsurface lithogeochemical data using the  
12 concentration–volume (C–V) and power spectrum–volume (S–V) fractal models in  
13 the Pulang porphyry copper deposit, southwest China. Results obtained by the  
14 concentration–volume model depict four geochemical zones defined by Cu thresholds  
15 of 0.25%, 1.38% and 1.88%, which represent non-mineralized wall rocks (Cu<0.25%),  
16 weakly mineralized zones (0.25%–1.38%), moderately mineralized zones  
17 (1.38%–1.88%), and highly mineralized zones (Cu>1.88%). S–V model is used by  
18 performing 3D fast Fourier transformation on assay data in the frequency domain.  
19 The S–V method reveals three mineralized zones characterized by Cu threshold  
20 values of 0.23% and 1.33%. The zones of <0.23% Cu represent barren host rocks and  
21 zones of 0.23%-1.33% Cu represent the hypogene zones and zones >1.33% Cu  
22 represent supergene enrichment zones. Both the multifractal models show that high  
23 grade mineralization is located at the center and southern parts of Pulang deposit. The  
24 results are compared with the alteration and mineralogical models resulted from the  
25 3D geological model using the logratio matrix method. The results show that the S–V  
26 model gives better results to identify highly mineralized zones in the deposit.  
27 However, the results of C–V method for moderately and weakly grade mineralization  
28 zones are more accurate than the zones obtained from S–V method.

29 Keywords: Fractal; Concentration–volume model (C–V); Power spectrum–volume  
30 model (S–V); Mineralized zone; the Pulang porphyry copper deposit

## 31 **1. Introduction**

32 The delineation and recognition of various mineralized zones and  
33 non–mineralized wall rocks are the main goal in the mineral exploration work.  
34 Investigation of ore mineralogy and paragenetic sequence provides useful data on  
35 ore-forming processes in deposits, because the typical characteristics of various types  
36 of ore deposits are reflected by their mineral assemblages (Craig and Vaughan, 1994;  
37 White and Hedenquist, 1995). Common methods are usually based on mineralography,  
38 petrography and alteration minerals assemblages to delineate various mineralized  
39 zones in porphyry deposits (Beane, 1982; Schwartz, 1947; Sillitoe, 1997; Berger et al.,  
40 2008). Lowell (1968) firstly proposed a conceptual model of lateral and vertical  
41 variations in mineralogy within alteration zones. Some similar models were  
42 developed related to potassic alteration usually situated in the center and deep parts of  
43 porphyry ore deposits based on this model (Sillitoe and Gappe, 1984; Cox and Singer,  
44 1986; Melfos et al., 2002). There are also other methods such as stable isotope studies  
45 and fluid inclusion to outline various mineralization phases based on thermometric  
46 and isotope element parameters along with other geological particulars (Boyce et al.,  
47 2007; Faure et al., 2002; Wilson et al., 2007). The drillhole data with a logging  
48 information containing mineralogical information, host rock changes and  
49 alteration is helpful to delineate the mineralization zones. Different geological  
50 interpretations could be presented for detecting zone boundaries, which may also lead  
51 to different results because the elemental grade distribution may not be taken into  
52 consideration.

53 Non-Euclidian fractal geometry is an significant branch of non-linear  
54 mathematical sciences. It is utilized in various research fields of geosciences since the  
55 1980s (Mandelbrot, 1983). The relationships between geology, geochemistry and  
56 mineralogical settings with spatial information can be researched by the methods  
57 based on fractal geometry (Afzal et al., 2011; Carranza, 2008, 2009). Bolviken et al.

58 (1992) and Cheng et al. (1994) have shown that geochemical patterns of various  
59 elements have fractal dimensions. The concentration–area (C–A) fractal model was  
60 proposed by Cheng et al. (1994) to recognize geochemical anomalies from  
61 backgrounds and calculate elemental thresholds of different geochemical data.  
62 Furthermore, there are many other fractal models proposed and applied in  
63 geochemical exploration work including number–size (N–S) fractal model proposed  
64 by Mandelbrot (1983) and Agterberg (1995), power spectrum–area (S–A) fractal  
65 model proposed by Cheng et al.(1999), concentration–distance (C–D) fractal model  
66 proposed by Li et al. (2003), concentration–volume (C–V) fractal model proposed by  
67 Afzal et al. (2011) and power spectrum–volume (S–V) fractal model proposed by  
68 Afzal et al. (2012).

69 Methods of fractal analysis also serve to illustrate relationships of geological,  
70 geochemical and mineralogical settings with spatial information derived from analysis  
71 of mineral deposit occurrence data (Carranza, 2008, 2009, 2010; Carranza et al., 2009;  
72 Goncalves et al., 2001; Wang et al., 2011; Zuo et al., 2009). Different geochemical  
73 processes could be described based on differences within fractal dimensions obtained  
74 from research of relevant geochemical data. Afzal et al.(2011) considered that the  
75 log–log plots obtained by fractal methods are useful tools to delineate different  
76 geological populations of geochemical data and the thresholds could be determined as  
77 some break points in those plots.

78 The application of fractal models to delineate various grade mineralization zones  
79 was dependent on the relationships between metal grades and volumes (Afzal et al.,  
80 2011; Cheng, 2007; Sim et al., 1999; Agterberg et al., 1993; Turcotte, 1986). The  
81 concentration–volume (C–V) and power spectrum–volume (S–V) fractal models were  
82 proposed by Afzal et al. (2011, 2012) to delineate various grade mineralization zones.  
83 We utilized C–V and S–V fractal models to delineate various mineralized zones and  
84 barren host rocks in the Pulang copper deposit in this paper.

## 85 **2. Fractal models**

### 86 2.1. Concentration–volume fractal model

87 Afzal et al.(2011) proposed concentration–volume (C-V) fractal model based on  
88 the same idea as the concentration–area (C-A) model (Cheng et al., 1994) to analysis  
89 the relationship between the concentration of ore elements and accumulative volume  
90 with concentration greater than or equal to the presented value (Afzal et al., 2011;  
91 Sadeghi et al., 2012; Soltani et al.,2014; Zuo et al., 2016; Sun and Liu, 2014; Wang, G.  
92 et al., 2012). It could be shown as:

$$93 \quad V(\rho \leq v) \propto \rho^{-a_1}; V(\rho \geq v) \propto \rho^{-a_2} \quad (1)$$

94  $V(\rho \geq v)$  and  $V(\rho \leq v)$  represent those occupied volumes with concentrations above or  
95 equal to and less than or equal to the contour value  $v$ ;  $v$  indicates the threshold value  
96 of a zone;  $a_1$  and  $a_2$  are the characteristic indexes. Thresholds obtained by this method  
97 indicate the boundaries between different grade mineralization zones and barren host  
98 rocks of ore deposits. The drillhole data of elemental concentration values were  
99 interpolated by using geostatistical estimation to compute  $V(\rho \geq v)$  and  $V(\rho \leq v)$ , which  
100 are the volume values enclosed by a contour level  $\rho$  in a 3D model.

## 101 2.2. Power spectrum–volume fractal model

102 Different geochemical patterns in the spatial domain could be seen as layered  
103 signals of various frequencies. Cheng et al. (1999) proposed the power spectrum–area  
104 (S-A) fractal model to recognize geochemical anomalies from backgrounds utilizing  
105 the method of spectrum analysis in frequency domain according to this argument.  
106 This model is combined with concentration–area (C-A) model (Cheng et al. 1994). It  
107 offers an useful tool to determine an optimum threshold value between various  
108 patterns based on the scaling property.

109 Afzal et al.(2012) proposed the power spectrum–volume (S–V) fractal model to  
110 delineate different grade mineralization zones based on the same idea as the S–A  
111 model proposed by Cheng et al.(1999). S–V method was utilized in frequency domain.  
112 And it was performed by applying the fast Fourier transformation for assay data. The  
113 straight lines obtained by log–log plots indicate the relationships between power  
114 spectrums and relevant volumes of ore elements. They were utilized to recognize the  
115 hypogene zones and supergene enrichment zones from barren host rocks and leached

116 zone of the deposit. The recognition of various mineralization zones is on the basis  
117 of the power-law relationships between power spectrums and occupied volumes. The  
118 formula is as follows:

$$119 \quad V(\geq S) \propto S^{-2/\beta} \quad (2)$$

120 Where, the power-law relationships between power spectrums ( $S = \|F(W_x, W_y,$   
121  $W_z)\|$ ) and occupied volumes with power spectrums greater than or equal to  $S$  can be  
122 indicated by this form;  $F$  represents the fast Fourier transformation of the  
123 measurement  $\mu(x, y, z)$ ;  $W_x, W_y$  and  $W_z$  respectively indicate wave numbers or  
124 angular frequencies in  $X, Y$  and  $Z$  axes directions on a 3D model. The range of index  
125  $\beta$  is  $0 < \beta \leq 2$  or  $1 \leq 2/\beta$  with the special case of  $\beta = 2$  or  $2/\beta = 1$  corresponding to  
126 non-fractal or monofractal and  $1 < 2/\beta$  to multifractals (Cheng, 2006).

127 By using the method of geostatistical estimation, drill hole data of elemental  
128 concentration values were interpolated to construct the block model with ore element  
129 distribution. The power spectrum values can be obtained by using 3D fast Fourier  
130 transformation for ore element grades. The logarithm of all power spectrum values  
131 and accumulative volume values were calculated. And the log-log plot between power  
132 spectrums and volumes was drawn according to previous counted values. Then the  
133 filters were constructed on the basis of threshold values obtained by the log-log plot  
134 of  $S$ - $V$ . Finally, the power spectrums were converted back to the space domain by  
135 utilizing inverse fast Fourier transformation.

### 136 **3. The geological setting of Pulang copper deposit**

137 The Pulang porphyry copper deposit is situated in the southern end of the Yidun  
138 continental arc, southwest China (Fig. 1). The continental arc was produced due to the  
139 westward subduction of Garze-Litang oceanic crust (Deng et al., 2014b, 2015; Wang  
140 et al., 2014). The Pulang ore deposit, one of the largest porphyry copper deposits in  
141 China (Deng et al., 2012, 2014a; Mao et al., 2012, 2014), is characterized by typical  
142 porphyry-type alteration zone. And Leng et al. (2012) and Li et al. (2011, 2013) have  
143 systematically researched the detailed geological characteristics of Pulang deposit,  
144 such as the representative alteration types and their zonation, the geometry of orebody,

145 metallogenic time and the geodynamic settings of this deposit. The Pulang deposit  
146 consists of five ore-bearing porphyries. They cover an area of about 9 km<sup>2</sup>, and the  
147 explored ore tonnage of Cu is estimated to be 6.50 Mt (Liu et al., 2013).

148 The outcrop strata of Pulang deposit are dominated by Upper Triassic Tumugou  
149 Formation clastic rocks and andesite, and Quaternary sediments (Fig.1c). The Triassic  
150 porphyry intrusions mainly comprise quartz monzonite porphyry, quartz diorite  
151 porphyry, quartz diorite porphyrite and granodiorite porphyry. The Tumugou  
152 Formation strata was intruded by the quartz diorite porphyry with an age of 219.6 ±  
153 3.5 Ma (Zircon U–Pb dating) (Pang et al., 2009). Then quartz monzonite porphyry  
154 with an age of 212.8 ± 1.9 Ma and granodiorite porphyry with an age of 206.3 ± 0.7  
155 Ma (Zircon U–Pb dating) (Liu et al., 2013) crosscut quartz diorite porphyry,  
156 respectively. The quartz monzonite porphyry is considered to be associated with  
157 mineralization because its age is similar with the molybdenite Re–Os isochron age of  
158 213 ± 3.8 Ma from orebody (Zeng et al., 2004). Moreover, the Cu concentrations of  
159 quartz monzonite porphyry are higher than the other porphyries.

160 <Fig. 1 inserts here>

161 The porphyry-type alteration zones transit upward and outward from early  
162 potassium–silicate, through quartz–sericite to propylitization from the core of the  
163 quartz monzonite porphyry (Fig. 4). Most wall rocks near the porphyries were  
164 changed into hornfels. Systematic drilling has demonstrated that the  
165 potassium–silicate and quartz–sericite zones host the main orebodies. And they  
166 constitute the core of mineralized zones. And the weak mineralization appear in the  
167 propylitic zones and hornfels surrounding the core. The orebodies occur as veins  
168 within the propylitic zones and hornfels. Major rock types in the deposit are quartz  
169 monzonite porphyry, quartz diorite porphyrite, granite diorite porphyry, quartz diorite  
170 porphyry and hornfels (Fig. 2). Metallic minerals mainly include chalcopyrite, pyrite  
171 and some molybdenite and pyrrhotite (Fig. 3).

172 <Fig. 2 inserts here>

173 <Fig. 3 inserts here>

174 <Fig. 4 inserts here>

#### 175 **4. Fractal modeling**

176 Based on the geological data of this deposit, such as the collar coordinates,  
177 azimuth, dip, mineralogy and lithology recorded from 130 drillholes, 20492  
178 lithochemical samples have been collected at 2 m intervals. The laboratory of the  
179 3rd Geological Team of the Yunnan Bureau of Geology and Mineral Resources  
180 utilized the iodine–fluorine and oscillo-polarographic method to analyze the  
181 concentrations of Cu and associated paragenetic elements and its analytical  
182 uncertainty is less than 7% (Yunnan Diqing Nonferrous Metal Co. Ltd., 2009). Only  
183 Cu concentrations were researched in this study. The distribution of Cu concentrations  
184 is log-normal (Fig. 5). The experimental semi–variogram of Cu data of Pulang deposit  
185 indicates a range and nugget effect of 320.0m and 0.25, separately (Fig. 6). The  
186 spherical model is fitted in regard to the experimental semi–variogram. The 3D model  
187 of Cu concentrations distribution of Pulang deposit was produced with ordinary  
188 kriging method using the Geovia Surpac software on the basis of the semi–variogram  
189 and anisotropic ellipsoid. Fundamentally, the accuracy of the interpolation results  
190 mainly depends on whether the interpolation model could well fit the spatial  
191 distribution characteristics of the deposit. Ordinary kriging was used because it is  
192 compatible with a stationary model; it only involves a variogram, and it is in fact the  
193 form of kriging used most (Chilès and Delfiner, 1999). Goovaerts (1997) showed that  
194 the values in un-sampled locations are estimated by the ordinary kriging method  
195 according to moving average of the interest variables satisfying various distribution  
196 forms of data. It is a spatial estimation method where the error variance is minimized.  
197 This error variance is based on the configuration of the data and its variogram  
198 (Yamamoto, 2005). The correct variogram in kriging interpolation can guarantee the  
199 accuracy of the interpolation results.

200 The accuracy of the spatial interpolation analysis is verified by comparing the  
201 difference between the measured values and the predicted values, so as to select the  
202 best variogram model. In order to test the variogram model, the cross-validation  
203 method was used to determine whether the parameters of the variogram model are

204 correct. The distribution of the residual is normal (Fig.7) and the mean of error  
205 between the actual and estimated Cu grade values is equal to 0 (Table 1). It indicates  
206 that this model is reasonable, and the variogram parameters are unbiased for  
207 estimating the Cu grade.

208 The obtained block models were used as input to the fractal models. The Pulang  
209 deposit was modeled by 20m × 20m × 5m voxels and they were decided by the grid  
210 drilling dimensions and geometrical properties of the deposit (David, 1970). The  
211 Pulang deposit is totally modeled with 150,973 voxels. The terms of “highly”,  
212 “moderately” and “weakly” have been used to classify the mineralized zones based on  
213 fractal modeling and accordance with the classification of in terms of ore grades in the  
214 deposit.

215 <Fig. 5 inserts here>

216 <Fig. 6 inserts here>

#### 217 **4.1. Concentration–volume (C–V) fractal modeling**

218 The occupied volume values corresponding to Cu grades were computed to  
219 obtain the concentration–volume model according to the 3D model of Pulang deposit.  
220 Through the obtained C–V log–log plot, the threshold values of Cu grades were  
221 determined (Fig.8). It indicates the power-law relationship between Cu grades and  
222 volumes. Three thresholds and four populations were obtained from C–V log–log plot,  
223 consequently. The first Cu threshold is 0.25%. The range of Cu values of <0.25%  
224 represent barren host rocks. The second Cu threshold is 1.38%, and values of  
225 0.25–1.38% Cu represent weakly grade mineralization zones. And the third Cu  
226 threshold is 1.88%. The range of Cu values of 1.38–1.88% denote moderately  
227 mineralized zones, and values of >1.88% Cu indicate highly mineralized zones (Table  
228 2). According to the results, the low concentration zones exist in many parts of Pulang  
229 deposit and are disposed along the northwest–southeast trend of the deposit.  
230 Moderately and highly mineralized zones are located at several parts of the center and  
231 south of Pulang deposit (Fig. 9).

232



## 233 **4.2. Power spectrum–volume (S–V) fractal modeling**

234 According to the geological data, such as the collar coordinates, azimuth, dip,  
235 mineralogy and lithology recorded from 130 drill holes, a 3D model and block model  
236 of Cu distribution of Pulang deposit were constructed with ordinary kriging method  
237 using the Geovia Surpac software.

238 The power spectrum (S) were computed for the 3D elemental distribution  
239 utilizing 3D fast Fourier transformation by MATLAB (R2016a). The logarithmic  
240 values of power spectrums and relevant volume values were plotted against each other  
241 (Fig. 10). The straight lines fitted through the log–log plot indicate different  
242 relationships between power spectrums and occupied volumes. The results have  
243 indicated that there are two thresholds and three different power–law relationships.  
244 The thresholds of  $\log S=7.81$  and  $\log S=8.70$  were decided by the log–log S–V plot.  
245 The 3D filters were designed to separate different mineralization zones on the basis of  
246 these threshold values. Inverse fast Fourier transformation was used to convert the  
247 decomposed components back into the space domain by MATLAB (R2016a).  
248 According to the results, Cu concentrations of the hypogene zones range from 0.23%  
249 to 1.33% (Table 3), and values of  $>1.33\%$  Cu refer to the supergene enrichment zones,  
250 whereas values of  $<0.23\%$  Cu pertain to the leached zone and barren host rocks (Fig.  
251 11).

252 <Fig. 9 inserts here>

253 <Fig. 10 inserts here>

254 < Table 2 inserts here>

## 255 **5. Comparison of fractal models and geological model of the deposit**

256 Alteration models have a key role in zone delineation and also in presenting  
257 geological models, as described by Lowell and Guilbert (1970). The potassic and  
258 phyllic alterations control major mineralization within supergene enrichment and  
259 hypogene zones according to these models. The models of various mineralization  
260 zones obtained by the fractal methods could be compared with geological data to  
261 validate these results.

262 Results of fractal models of Pulang deposit were in contrast with the 3D  
263 geological model of Pulang deposit constructed by utilizing Geovia Surpac software  
264 and drillholes data (Fig. 2). Furthermore, the results obtained from fractal models are  
265 also controlled by mineralogical investigations.

266 Carranza (2011) has illustrated an analysis for calculation of spatial correlations  
267 between two binary especially mathematical and geological models. An intersection  
268 operation between the mineralization zones obtained from fractal models and different  
269 alteration zones in the geological model was performed to derive the amount of  
270 voxels corresponding to each of the classes of overlap zones (Table 4). Using the  
271 obtained numbers of voxels, Type I error (T1E), Type II error (T2E), and overall  
272 accuracy (OA) of the fractal model were estimated with respect to different alteration  
273 zones due to geological data (Carranza, 2011). And the values of OA of fractal models  
274 of mineralized zones were compared with each other as follows.

275 The comparison between highly mineralized zones on the basis of the fractal  
276 models and potassic alteration zones resulted from the 3D geological model illustrates  
277 that the results of these two fractal models are similar. The overall accuracy values of  
278 C–V and S–V models are 0.50 and 0.52 as shown in Table 5, which illustrate that the  
279 S–V model gives more accurate results to recognize highly grade mineralization  
280 zones in Pulang deposit.

281 Comparison between phyllic alteration zones resulted from the 3D geological  
282 model and moderately grade mineralization zones obtained from fractal methods  
283 indicates that OA values of C–V and S–V fractal methods in regard to phyllic  
284 alteration zones of the geological model are 0.59 and 0.56 (Table 6). The OA values  
285 of moderately and weakly grade mineralization zones obtained from C–V model is  
286 higher than the results obtained from S–V model.

287 It could be considered that there are spatial correlations between different  
288 modeled Cu zones and geological features such as alterations and mineralogy. Several  
289 samples were collected from different drill holes in different grade mineralization  
290 zones of Pulang deposit to validate the results of fractal models. They were analyzed  
291 by microscopic identification and XRF (X-ray Fluorescence Spectrometer). PL-B82

292 sample was collected from the drill hole situated in the high grade mineralization  
293 zones. There are high chalcopyrite content and some molybdenite (Fig.14a). PL-B62  
294 sample was collected from the drill hole situated in the moderate grade mineralization  
295 zones. There are low chalcopyrite content and some pyrrhotite content in polished  
296 section (Fig.14b). PL-B74 sample was collected from the drill hole located at the  
297 weakly mineralized zones with lower chalcopyrite content and some pyrrhotite  
298 (Fig.14c and Fig.14d). Results obtained from mineralogy, microscopic identification  
299 and drillcore scanning by XRF of these samples indicates that Cu concentrations are  
300 1.80%,1.32% and 0.41% in PL-B82, PL-B62 and PL-B74 samples, respectively  
301 (Table 7).

## 302 **6. Conclusions**

303 In the many cases, drillcore logging in the field is dealing with the lack of proper  
304 diagnosis of geological phenomenon and it can undermine delineation of mineralized  
305 zones because it depends on the interpretation of individual loggers, which is  
306 subjective and no two loggers usually have the same interpretations. However,  
307 conventional geological modeling based on drillcore data is fundamentally important  
308 for ore body spatial structure understanding and mathematical applications. Grades of  
309 the ore elements are not observed in conventional methods of geological ore modeling  
310 while the variations in ore grades in a mineral deposit is an obvious and salient feature.  
311 Given the problems as mentioned above, using a series of newly established methods  
312 based on mathematical analyses such as fractal modeling seems to be inevitable.

313 This study utilized the concentration–volume (C–V) and power  
314 spectrum–volume (S–V) fractal models to delineate and recognize different grade Cu  
315 mineralization zones of Pulang copper deposit. Both the fractal models reveal high  
316 grade Cu mineralization zones is located at the central and southern parts of Pulang  
317 deposit. The Cu threshold of high grade mineralization zones is 1.88% according to  
318 C–V method. And Cu threshold of supergene enrichment zones is 1.33% on the basis  
319 of S–V method. Models of moderate grade mineralization zones contain 1.38–1.88%  
320 Cu according to the C–V method. And the hypogene zones contain 0.23–1.33% Cu

321 according to the S–V model. The C–V method shows barren host rocks include  
322 <0.25% and weak grade mineralization include 0.25–1.38% Cu. And the S–V model  
323 reveals that barren host rock and leached zone contain <0.23% Cu.

324 Carranza (2011) has illustrated an analysis for calculation of spatial correlations  
325 between two binary especially mathematical and geological models. An intersection  
326 operation between the mineralization zones obtained from fractal models and different  
327 alteration zones in the geological model was performed to derive the amount of  
328 voxels corresponding to each of the classes of overlap zones. Using the obtained  
329 numbers of voxels, Type I error (T1E), Type II error (T2E), and overall accuracy (OA)  
330 of the fractal models were estimated with respect to different alteration zones due to  
331 geological data. And the values of OA of fractal models of mineralized zones were  
332 compared with each other.

333 The comparison between highly mineralized zones based on the fractal models  
334 and potassic zones resulted from 3D geological model illustrates that the S–V fractal  
335 model is better than the C–V model because the fact that the number of overlapped  
336 voxels (A) in the S–V model is higher than those in the C–V model. The overall  
337 accuracy values of C–V and S–V fractal models with respect to the potassic alteration  
338 zones of the geological model are 0.50 and 0.52, which illustrate that the S–V model  
339 gives better results to recognize high grade mineralization zones in Pulang deposit.  
340 On the other hand, correlation (from OA results) between highly mineralized zones  
341 obtained from S–V modeling and the potassic alteration zones is higher than the C–V  
342 model because of a strong proportional relationship between extension and positions  
343 of voxels in the S–V model and potassic alteration zones in the 3D geological model.

344 Comparison between phyllic alteration zones resulted from the 3D geological  
345 model and moderate grade mineralization zones obtained from fractal methods  
346 indicates that OA values of C–V and S–V fractal methods in regard to phyllic  
347 alteration zones of the geological model are 0.59 and 0.56, respectively. The OA  
348 values of moderate and weak grade mineralization zones obtained from C–V model is  
349 higher than the results obtained by S–V model. On the other hand, moderately  
350 mineralized zones defined by C–V modeling have overlap with the phyllic alteration

351 zones in the 3D geological model. However, the outcomes of the C–V model are more  
352 accurate than those of the S–V model with respect to the phyllic alteration zones in  
353 the 3D geological model.

354 According to the correlation between results driven by fractal modeling and  
355 geological logging from drill holes in the Pulang porphyry copper deposit, high  
356 grade mineralization zones generated by fractal models, especially the S–V model,  
357 have a better correlation with potassic alteration zones resulted from the 3D  
358 geological model than the C–V model. And moderately mineralized zones correlate  
359 with phyllic alteration zones in the central and southern parts of the Pulang deposit.  
360 There is a better relationship between moderately and weakly mineralized zones  
361 derived by the C–V model and the phyllic alteration zones according to the 3D  
362 geological model than the S–V model.

363

### 364 **Acknowledgements**

365 This research was supported by the National Key R&D Program of China  
366 (2016YFC0600508). The authors thank Tao Dong, Haijun Yu, Qiwu Shen, Zhipeng Li,  
367 Baosheng Shi and Jinhong Yang for supporting in field investigation and providing  
368 parts of raw data.

369

370

371

372

373

374

375

376

377

378

379

## 380 **References**

- 381 Agterberg, F.P., Cheng, Q., and Wright, D.F.: Fractal modeling of mineral  
382 deposits, in: Proceedings of the 24th APCOM Symposium, Montreal, Canada, 43–53,  
383 1993.
- 384 Agterberg, F.P.: Multifractal modeling of the sizes and grades of giant and supergiant  
385 deposits, *International Geology Review*, 37, 1–8, [https://doi.org/10.1080/](https://doi.org/10.1080/00206819509465388)  
386 00206819509465388, 1995.
- 387 Afzal, P., Fadakar Alghalandis, Y., Khakzad, A., Moarefvand, P., and Rashidnejad  
388 Omran, N.: Delineation of mineralization zones in porphyry Cu deposits by fractal  
389 concentration–volume modeling, *J. Geochem. Explor.*, 108, 220–232, [https://doi.org/](https://doi.org/10.1016/j.gexplo.2011.03.005)  
390 10.1016/j.gexplo.2011.03.005, 2011.
- 391 Afzal, P., Fadakar Alghalandis, A., Moarefvand, P., Rashidnejad Omran, N., and Asadi  
392 Haroni, H.: Application of power–spectrum–volume fractal method for detecting  
393 hypogene, supergene enrichment, leached and barren zones in Kahang Cu porphyry  
394 deposit, Central Iran, *J. Geochem. Explor.*, 112, 131–138, [https://doi.org/10.1016/](https://doi.org/10.1016/j.gexplo.2011.08.002)  
395 j.gexplo.2011.08.002, 2012.
- 396 Beane, R.E.: Hydrothermal alteration in silicate rocks, in: *Advances in Geology of the*  
397 *Porphyry Copper Deposits, Southwestern North America*, Titley, S.R. (Ed.), The  
398 University of Arizona Press, Tucson, 117–137, 1982.
- 399 Bolviken, B., Stokke, P.R., Feder, J., and Jossang, T.: The fractal nature of  
400 geochemical landscapes, *J. Geochem. Explor.*, 43, 91–109, [https://doi.org/10.1016/](https://doi.org/10.1016/0375-6742(92)90001-O)  
401 0375-6742(92)90001-O, 1992.
- 402 Boyce, A.J., Fulgnati, P., Sbrana, A., and Fallick, A.E.: Fluids in early stage  
403 hydrothermal alteration of high-sulfidation epithermal systems: a view from the  
404 volcano active hydrothermal system (Aeolian Island, Italy), *Journal of Volcanology*  
405 *and Geothermal Research*, 166, 76–90, [https://doi.org/10.1016/j.jvolgeores.](https://doi.org/10.1016/j.jvolgeores.2007.07.005)  
406 2007.07.005, 2007.
- 407 Berger, B. R., Ayuso, R. A., Wynn, J. C., and Seal, R. R.: Preliminary Model of  
408 Porphyry Copper Deposits, USGS, Open-File Report, 1321 pp., 2008.

409 Cox, D. and Singer, D.: Mineral deposits models, US Geological Survey Bulletin,  
410 1693 pp., 1986.

411 Craig, G.R. and Vaughan, D.: Ore Microscopy and Ore Petrography, John Wiley  
412 and Sons, 1994.

413 Chilès, J.P. and Delfiner, P.: Geostatistics: Modeling Spatial Uncertainty, Wiley,  
414 New York, 695 pp., 1999.

415 Carranza, E.J.M.: Geochemical Anomaly and Mineral Prospectivity Mapping in GIS.  
416 Handbook of Exploration and Environmental Geochemistry, 11, Amsterdam, Elsevier,  
417 351 pp., 2008.

418 Carranza, E. J. M.: Controls on mineral deposit occurrence inferred from analysis of  
419 their spatial pattern and spatial association with geological features, Ore Geol. Rev., 35,  
420 383–400, <https://doi.org/10.1016/j.oregeorev.2009.01.001>, 2009.

421 Carranza, E.J.M., Owusu, E.A., and Hale, M.: Mapping of prospectivity and  
422 estimation of number of undiscovered prospects for lode gold, southwestern Ashanti  
423 Belt, Ghana, Mineralium Deposita, 44, 915–938, <https://doi.org/10.1007/s00126-009-0250-6>, 2009.

425 Carranza, E.J.M.: From predictive mapping of mineral prospectivity to quantitative  
426 estimation of number of undiscovered prospects. Resource Geology 61, 30–51, 2010.

427 Carranza, E.J.M.: Analysis and mapping of geochemical anomalies using  
428 logratio-transformed stream sediment data with censored values, J. Geochem. Explor.,  
429 110, 167–185, <https://doi.org/10.1016/j.gexplo.2011.05.007>, 2011.

430 Cheng, Q., Agterberg, F.P., and Ballantyne, S.B.: The separation of geochemical  
431 anomalies from background by fractal methods, J. Geochem. Explor., 51, 109–130,  
432 [https://doi.org/10.1016/0375-6742\(94\)90013-2](https://doi.org/10.1016/0375-6742(94)90013-2), 1994.

433 Cheng, Q.: Spatial and scaling modelling for geochemical anomaly separation, J.  
434 Geochem. Explor., 65, 175–194, [https://doi.org/10.1016/S0375-6742\(99\)00028-X](https://doi.org/10.1016/S0375-6742(99)00028-X),  
435 1999.

436 Cheng, Q.: Multifractal modelling and spectrum analysis: methods and applications to  
437 gamma ray spectrometer data from southwestern Nova Scotia, Canada, Science in  
438 China, Series D: Earth Sciences 49 (3), 283–294, 2006.

439 Cheng, Q.: Mapping singularities with stream sediment geochemical data  
440 for prediction of undiscovered mineral deposits in Gejiu, Yunnan Province, China, *Ore*  
441 *Geol. Rev.*, 32, 314–324, <https://doi.org/10.1016/j.oregeorev.2006.10.002>, 2007.

442 David, M.: *Geostatistical Ore Reserve Estimation*, Amsterdam, Elsevier, 283 pp.,  
443 1970.

444 Deng, J., Wang, C.M., and Li, G.J.: Style and process of the superimposed mineralization  
445 in the Sanjiang Tethys, *Acta Petrologica Sinica*, 28 (5), 1349–1361 (in Chinese with  
446 English abstract), 2012.

447 Deng, J., Wang, Q.F., Li, G.J., and Santosh, M.: Cenozoic tectono-magmatic  
448 and metallogenic processes in the Sanjiang region, southwestern China, *Earth Sci.*  
449 *Rev.*, 138, 268–299, <https://doi.org/10.1016/j.earscirev.2014.05.015>, 2014a.

450 Deng, J., Wang, Q.F., Li, G.J., Li, C.S., and Wang, C.M.: Tethys tectonic evolution  
451 and its bearing on the distribution of important mineral deposits in the Sanjiang  
452 region, SW China, *Gondwana Research*, 26 (2), 419–437, [https://doi.org/10.1016/](https://doi.org/10.1016/j.gr.2013.08.002)  
453 [j.gr.2013.08.002](https://doi.org/10.1016/j.gr.2013.08.002), 2014b.

454 Deng, J., Wang, Q.F., Li, G.J., Hou, Z.Q., Jiang, C.Z., and Danyushevsky, L.: Geology  
455 and genesis of the giant Beiya porphyry–skarn gold deposit, northwestern  
456 Yangtze Block, China, *Ore Geol. Rev.*, 70, 457–485, [https://doi.org/10.1016/](https://doi.org/10.1016/j.oregeorev.2015.02.015)  
457 [j.oregeorev.2015.02.015](https://doi.org/10.1016/j.oregeorev.2015.02.015), 2015.

458 Faure, K., Matsuhisa, Y., Metsugi, H., Mizota, C., and Hayashi, S.: The Hishikari  
459 Au–Ag epithermal deposit, Japan: oxygen and hydrogen isotope evidence in  
460 determining the source of paleohydrothermal fluids, *Economic Geology*, 97, 481–498,  
461 <https://doi.org/10.2113/gsecongeo.97.3.481>, 2002.

462 Goovaerts, P.: *Geostatistics for Natural Resources Evaluation*, Oxford University Press,  
463 New York, 496 pp., 1997.

464 Goncalves, M. A., Mateus, A., and Oliveira, V.: Geochemical anomaly separation by  
465 multifractal modeling, *J. Geochem. Explor.*, 72, 91–114, [https://doi.org/10.1016/](https://doi.org/10.1016/S0375-6742(01)00156-X)  
466 [S0375-6742\(01\)00156-X](https://doi.org/10.1016/S0375-6742(01)00156-X), 2001.

467 Lowell, J.D.: Geology of the Kalamazoo orebody, San Manuel district, Arizona,  
468 *Economic Geology*, 63, 645–654, <https://doi.org/10.2113/gsecongeo.63.6.645>, 1968.



469 Lowell, J.D. and Guilbert, J.M.: Lateral and vertical alteration-mineralization zoning  
470 in porphyry ore deposits, *Economic Geology*, 65, 373–408, [https://doi.org/10.2113/  
471 gsecongeo.65.4.373](https://doi.org/10.2113/gsecongeo.65.4.373), 1970.

472 Li, C., Ma, T., and Shi, J.: Application of a fractal method relating concentrations  
473 and distances for separation of geochemical anomalies from background, *J. Geochem.  
474 Explor.*, 77, 167–175, [https://doi.org/10.1016/S0375-6742\(02\)00276-5](https://doi.org/10.1016/S0375-6742(02)00276-5), 2003.

475 Li, W.C., Zeng, P.S., Hou, Z.Q., and White, N.C.: The Pulang porphyry copper  
476 deposit and associated felsic intrusions in Yunnan Province, Southwest China,  
477 *Economic Geology*, 106 (1), 79–92, <https://doi.org/10.2113/econgeo.106.1.79>, 2011.

478 Leng, C.B., Zhang, X.C., Hu, R.Z., Wang, S.X., Zhong, H., Wang, W.Q., and Bi, X.W.:  
479 Zircon U–Pb and molybdenite Re–Os geochronology and Sr–Nd–Pb–Hf isotopic  
480 constraints on the genesis of the Xuejiping porphyry copper deposit in Zhongdian,  
481 Northwest Yunnan, China, *Journal of Asian Earth Sciences*, 60, 31–48, 2012.

482 Liu, X.L., Li, W.C., Yin, G.H., and Zhang, N.: The geochronology, mineralogy and  
483 geochemistry study of the Pulang porphyry copper deposits in Geza arc of Yunnan  
484 Province, *Acta Petrologica Sinica*, 29(9), 3049–3064 (in Chinese with English  
485 abstract), 2013.

486 Mandelbrot, B. B.: *The Fractal Geometry of Nature*, W. H. Freeman, San Francisco,  
487 468 pp., 1983.

488 Melfos, V., Vavelidis, M., Christodes, G., and Seidel, E.: Origin and evolution of the  
489 Tertiary Maronia porphyry copper–molybdenum deposit, Thrace, Greece, *Mineralium  
490 Deposita*, 37, 648–668, <https://doi.org/10.1007/s00126-002-0277-4>, 2002.

491 Mao, J.W., Zhou, Z.H., Feng, C.Y., Wang, Y.T., Zhang, C.Q., Peng, H.J., and Yu, M.:  
492 A preliminary study of the Triassic large-scale mineralization in China and its  
493 geodynamic setting, *Geology in China*, 39(6), 1437–1471 (in Chinese with English  
494 abstract), 2012.

495 Mao, J.W., Pirajno, F., Lehmann, B., Luo, M.C., and Berzina, A.: Distribution of  
496 porphyry deposits in the Eurasian continent and their corresponding tectonic settings,  
497 *Journal of Asian Earth Sciences*, 79(Part B), 576–584, [https://doi.org/10.1016/  
498 j.jseaes.2013.09.002](https://doi.org/10.1016/j.jseaes.2013.09.002), 2014.

499 Pang, Z.S., Du, Y.S., Wang, G.W., Guo, X., Cao, Y., and Li, Q.: Single-grain zircon  
500 U–Pb isotopic ages, geochemistry and its implication of Pulang complex in Yunnan  
501 Province, China, *Acta Petrologica Sinica*, 25(1), 159–165 (in Chinese with English  
502 abstract), 2009.

503 Pyrcz, M.J. and Deutsch, C.V.: *Geostatistical Reservoir Modeling*, Oxford University  
504 Press, 2014.

505 Schwartz, G.M.: Hydrothermal alteration in the “porphyry copper” deposits,  
506 *Economic Geology*, 42, 319–352, <https://doi.org/10.2113/gsecongeo.42.4.319>, 1947.

507 Sillitoe, R.H. and Gappe, I.M.: Philippine porphyry copper deposits: geologic  
508 setting and characteristics, *Common Coordination Joint Resource (CCOP)*, 14, 1–89,  
509 1984.

510 Sillitoe, R.H.: Characteristics and controls of the largest porphyry copper–gold  
511 and epithermal gold deposits in the circum-pacific region, *Australian Journal of Earth  
512 Sciences*, 44, 373–388, <https://doi.org/10.1080/08120099708728318>, 1997.

513 Sim, B.L., Agterberg, F.P., and Beaudry, C.: Determining the cutoff between  
514 background and relative base metal contamination levels using multifractal methods,  
515 *Comput. Geosci.*, 25, 1023–1041, 1999.

516 Sadeghi, B., Moarefvand, P., Afzal, P., Yasrebi, A.B., and Saein, L.D.: Application of  
517 fractal models to outline mineralized zones in the Zaghia iron ore deposit, Central Iran,  
518 *J. Geochem. Explor.*, 122, 9–19, <https://doi.org/10.1016/j.gexplo.2012.04.011>, 2012.

519 Soltani, F., Afzal, P., and Asghari, O.: Delineation of alteration zones based on  
520 Sequential Gaussian Simulation and concentration–volume fractal modeling in the  
521 hypogene zone of Sungun copper deposit, NW Iran, *J. Geochem. Explor.*, 140, 64–76,  
522 <https://doi.org/10.1016/j.gexplo.2014.02.007>, 2014.

523 Sun, T. and Liu, L.: Delineating the complexity of Cu–Mo mineralization in a  
524 porphyry intrusion by computational and fractal modeling: A case study of the  
525 Chehugou deposit in the Chifeng district, Inner Mongolia, China, *J. Geochem. Explor.*,  
526 144, 128–143, <https://doi.org/10.1016/j.gexplo.2014.02.015>, 2014.

527 Turcotte, D.L.: A fractal approach to the relationship between ore grade and tonnage,  
528 *Economic Geology*, 18, 1525–1532, 1986.

529 Turcotte, D.L.: Fractals in geology and geophysics, *Pure Appl.Geophys.*, 131,  
530 171–196, 1989.

531 White, N.C. and Hedenquist, J.W.: Epithermal gold deposits: styles, characteristics and  
532 exploration, *SEG Newsletter*, 23, 1–14, 1995.

533 Wilson, A.J., Cooke, David, R., Harper, B.J., and Deyell, C.L.: Sulfur isotopic  
534 zonation in the Cadia district, southeastern Australia: exploration significance and  
535 implications for the genesis of alkalic porphyry gold–copper deposits, *Mineralium*  
536 *Deposita*, 42, 465–487, <https://doi.org/10.1007/s00126-006-0071-9>, 2007.

537 Wang, Q.F., Deng, J., Liu, H., Wang, Y., Sun, X., and Wan, L.: Fractal models for  
538 estimating local reserves with different mineralization qualities and spatial variations,  
539 *J. Geochem. Explor.*, 108, 196–208, <https://doi.org/10.1016/j.gexplo.2011.02.008>,  
540 2011.

541 Wang, Q.F., Deng, J., Li, C.S., Li, G.J., Yu, L., and Qiao, L.: The boundary between  
542 the Simao and Yangtze blocks and their locations in Gondwana and Rodinia:  
543 constraints from detrital and inherited zircons, *Gondwana Research*, 26(2),  
544 438–448, <https://doi.org/10.1016/j.gr.2013.10.002>, 2014.

545 Wang, G. W., Emmanuel John M. Carranza, Zuo, R., Hao, Y. L., Du, Y. S., Pang, Z. S.,  
546 and Sun Y.: Mapping of district-scale potential targets using fractal models, *J.*  
547 *Geochem. Explor.*, 122, 34–46, <https://doi.org/10.1016/j.gexplo.2012.06.013>, 2012.

548 Yamamoto, J.K.: Comparing Ordinary Kriging Interpolation Variance and Indicator  
549 Kriging Conditional Variance for Assessing Uncertainties at Unsampled Locations, in:  
550 *Application of Computers and Operations Research in the Mineral Industry*, edited by:  
551 Dessureault, S., Ganguli, R., Kecojevic, V., and Girard-Dwyer, J., Balkema, 2005.

552 Yunnan Diqing Nonferrous Metal Co. Ltd.: Exploration Report of Pulang Copper  
553 Deposit, Diqing, Yunnan, China, Yunnan Diqing Nonferrous Metal Co. Ltd.,  
554 Diqing Tibetan Autonomous Prefecture (in Chinese), 2009.

555 Zeng, P.S., Hou, Z.Q., Li, L.H., Qu, W.J., Wang, H.P., Li, W.C., Meng, Y.F., and Yang,  
556 Z.S.: Age of the Pulang porphyry copper deposit in NW Yunnan and its geological  
557 significance, *Geological Bulletin of China*, 23(11), 1127–1131 (in Chinese with  
558 English abstract), 2004.

559 Zuo, R., Cheng, Q., and Xia, Q.: Application of fractal models to characterization of  
560 vertical distribution of geochemical element concentration, *J. Geochem. Explor.*, 102,  
561 37–43, <https://doi.org/10.1016/j.gexplo.2008.11.020>, 2009.

562 Zuo, R. and Wang, J.: Fractal/multifractal modeling of geochemical data: A review, *J.*  
563 *Geochem. Explor.*, 164, 33-41, <https://doi.org/10.1016/j.gexplo.2015.04.010>, 2016.

564

565

566

567

568

569

570

571

572

573

574

575

576

577

578

579

580

581

582

583

584

585

586

587

588

589 **Fig.1.** Geological map of the Pulang porphyry copper deposit, SW China. Modified  
590 after Yunnan Diqing Nonferrous Metal Co. Ltd., 2009.

591 **Fig.2.** Geological 3D models including lithology, alteration and 3D drill hole plot with  
592 the legend of each in the Pulang porphyry copper deposit. (Scale is in  $m^3$ .)

593 **Fig.3.** Photographs of alteration and mineralization in the Pulang porphyry copper  
594 deposit, SW China. (a) Quartz monzonite porphyry with potassium-silicate alteration;  
595 (b) Quartz diorite porphyrite with quartz-sericite alteration; (c) Quartz diorite  
596 porphyrite with propylitic alteration; (d) Hornfels. Qtz=quartz; Pl=plagioclase;  
597 Kfs=K-feldspar; Bt=biotite; Ser=sericite; Chl=chlorite; Ep=epidote; Py=pyrite;  
598 Ccp=chalcopyrite; Mo=molybdenite; Po=pyrrhotite.

599 **Fig.4.** Cross section along exploration line 0 in the Pulang porphyry copper deposit,  
600 SW China. Modified after Wang et al., 2012.

601 **Fig.5.** Histograms of the Cu raw (a) and logarithmic transformation (b) data in the  
602 Pulang deposit.

603 **Fig.6.** The experimental semi-variogram (omni-directional) of Cu data in Pulang  
604 deposit.

605 **Fig.7.** The cross-validation results: (a) residual VS Cu grade; (b) the residual  
606 distribution histogram.

607 **Fig.8.** C-V log-log plot for Cu concentrations in the Pulang deposit.

608 **Fig.9.** Zones in the Pulang deposit based on thresholds defined from the C-V fractal  
609 model of Cu data: (a) highly mineralized zones; (b) moderately mineralized zones; (c)  
610 weakly mineralized zones; (d) barren host rock. (Scale is in  $m^3$ .)

611 **Fig.10.** S-V log-log plot for Cu concentrations in the Pulang deposit.

612 **Fig.11.** Zones in the Pulang deposit based on thresholds defined from the S-V fractal  
613 model of Cu data: (a) the supergene enrichment zones; (b) the hypogene zones; (c) the  
614 leached zone and barren host rock (Scale is in  $m^3$ .)

615 **Fig.12.** Highly mineralized zones in the Pulang deposit: (a) potassium-silicate zone  
616 resulted from the 3D geological model from drillcore geological data; (b) C-V  
617 modeling of Cu data; and (c) S-V modeling of Cu data (Scale is in  $m^3$ .)

618 **Fig.13.** Moderately mineralized zones in the Pulang deposit: (a) quartz-sericite zones  
619 resulted from the 3D geological model from drillcore geological data; (b) C-V  
620 modeling of Cu data; and (c) S-V modeling of Cu data (Scale is in  $m^3$ .)

621 **Fig.14.** Chalcopyrite content in several samples based on mineralogical study: (a)  
622 PL-B82 sample was collected from the drill hole situated in the high grade  
623 mineralization zones.; (b) PL-B62 sample was collected from the drill hole situated in  
624 the moderately grade mineralization zones.; (c) and (d) PL-B74 sample was collected  
625 from the drill hole located at the weakly mineralized zones.

626

627

628

629

630

631

632 **Table 1** The results of statistical characteristics of the residual.  
633 **Table 2** Thresholds concentrations obtained by using C–V model based on Cu% in  
634 Pulang deposit.  
635 **Table 3** Ranges of power spectrum (S) for different mineralization zones in Pulang  
636 deposit.  
637 **Table 4** Matrix for comparing performance of fractal modeling results with geological  
638 model. A, B, C, and D represent numbers of voxels in overlaps between classes in the  
639 binary geological model and the binary results of fractal models (Carranza, 2011).  
640 **Table 5** Overall accuracy (OA), Type I and Type II errors (T1E and T2E, respectively)  
641 with respect to potassic alteration zone resulted from geological model and threshold  
642 values of Cu obtained through C–V and S–V fractal modeling.  
643 **Table 6** Overall accuracy (OA), Type I and Type II errors (T1E and T2E, respectively)  
644 with respect to phyllic alteration zone resulted from geological model and threshold  
645 values of Cu obtained through C–V and S–V fractal modeling.  
646 **Table 7** Results of XRF analysis of samples collected from different mineralized  
647 zones in the Pulang porphyry copper deposit.  
648  
649  
650  
651  
652  
653  
654  
655

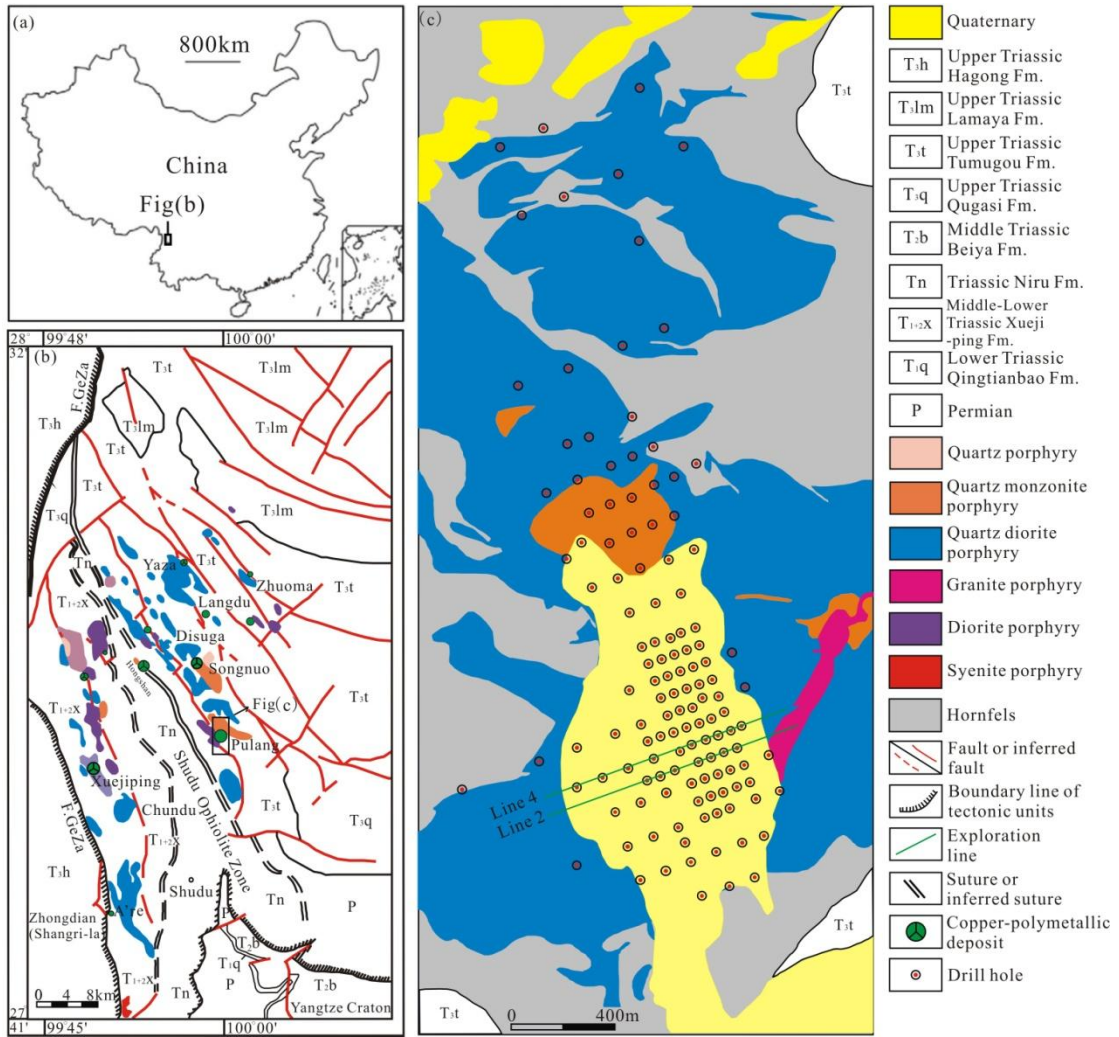

Fig. 1.

656  
657  
658  
659  
660  
661  
662  
663  
664  
665  
666  
667  
668

Lithology

- Qesl
- Quartz monzonite porphyry
- Quartz diorite porphyry
- Granite diorite porphyry
- Diorite porphyry
- Quartz diorite porphyry
- Hs

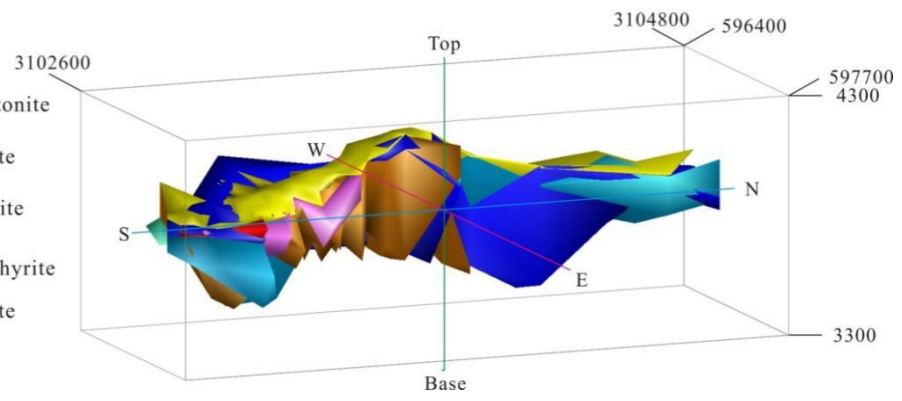

669

670

Alteration

- Potassium-silicate Zone
- Phyllic Zone
- Propylitic Zone
- Hornstone Zone

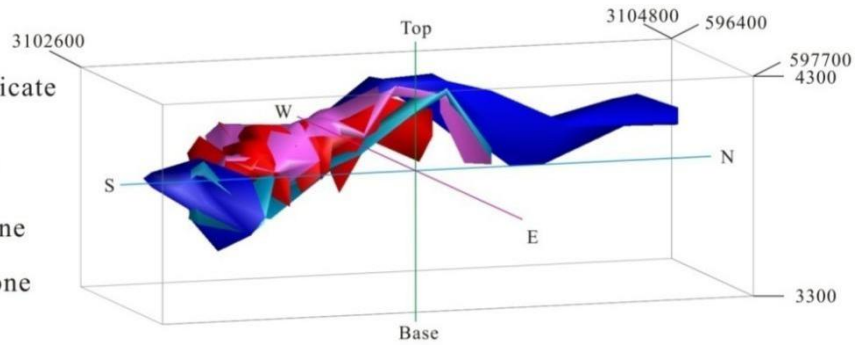

671

672

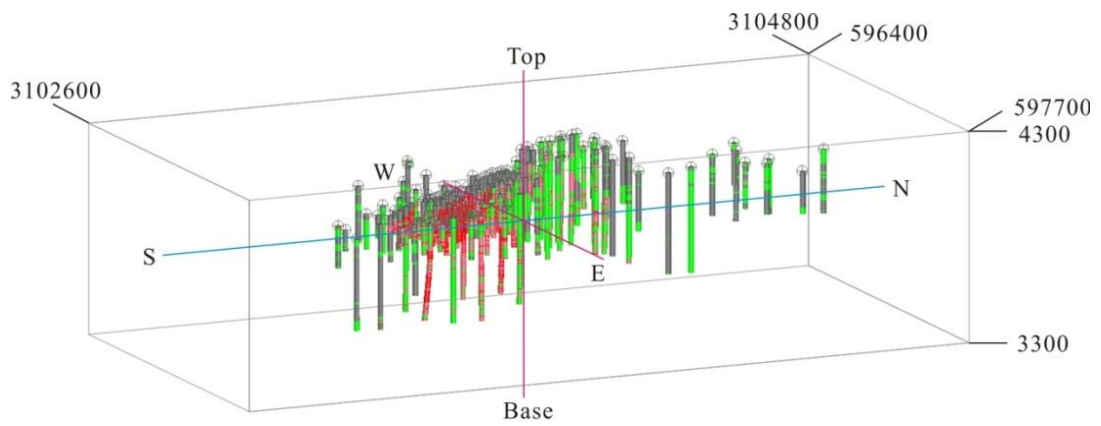

673

674

**Fig. 2.**

675

676

677

678

679

680

681



682  
683  
684  
685  
686  
687  
688  
689  
690  
691  
692  
693  
694  
695  
696  
697  
698  
699

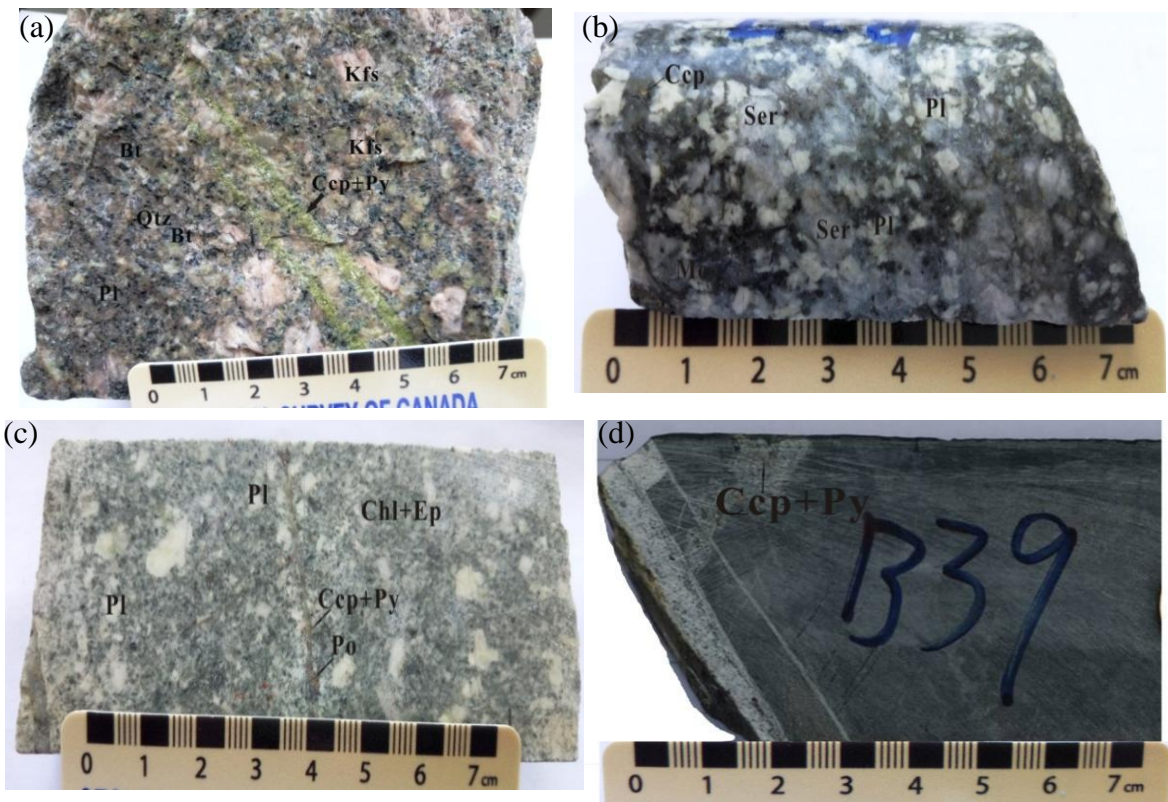

Fig. 3.

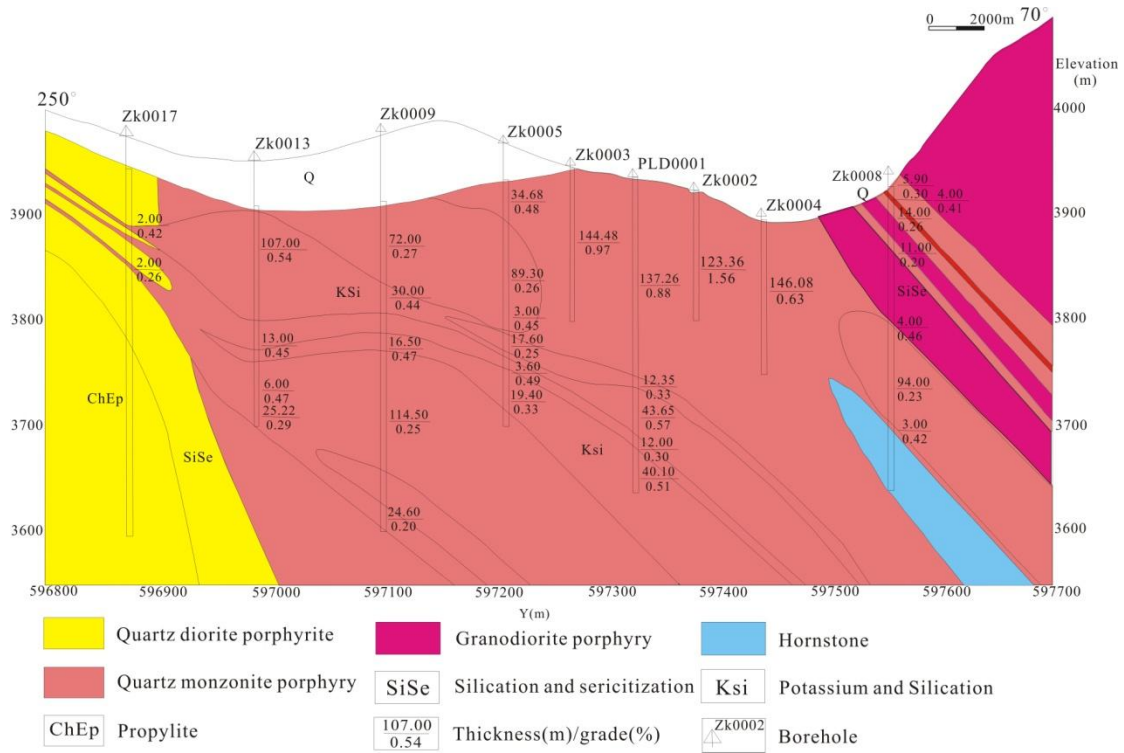

Fig. 4.

700  
701  
702  
703

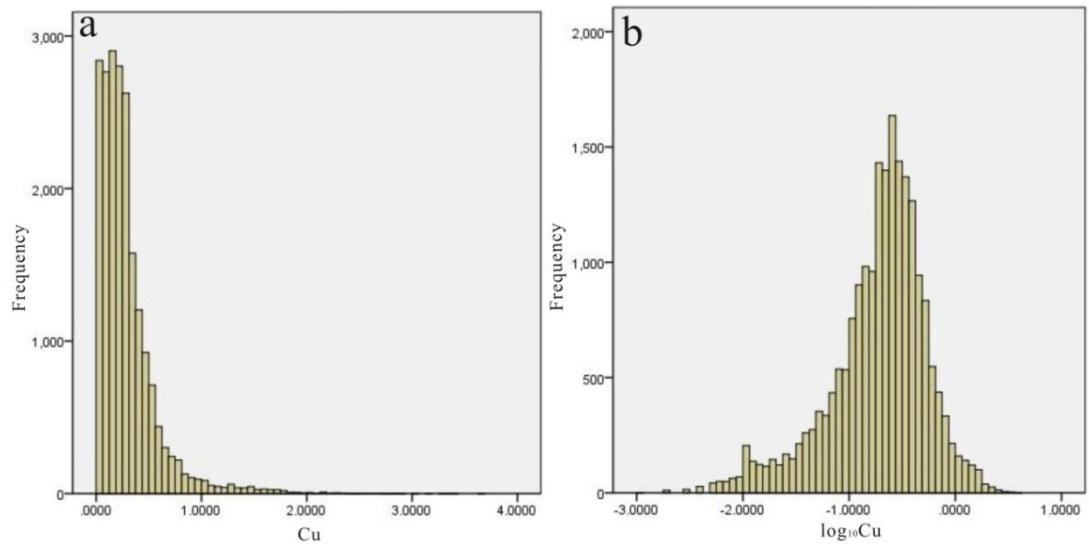

704  
705

**Fig. 5.**

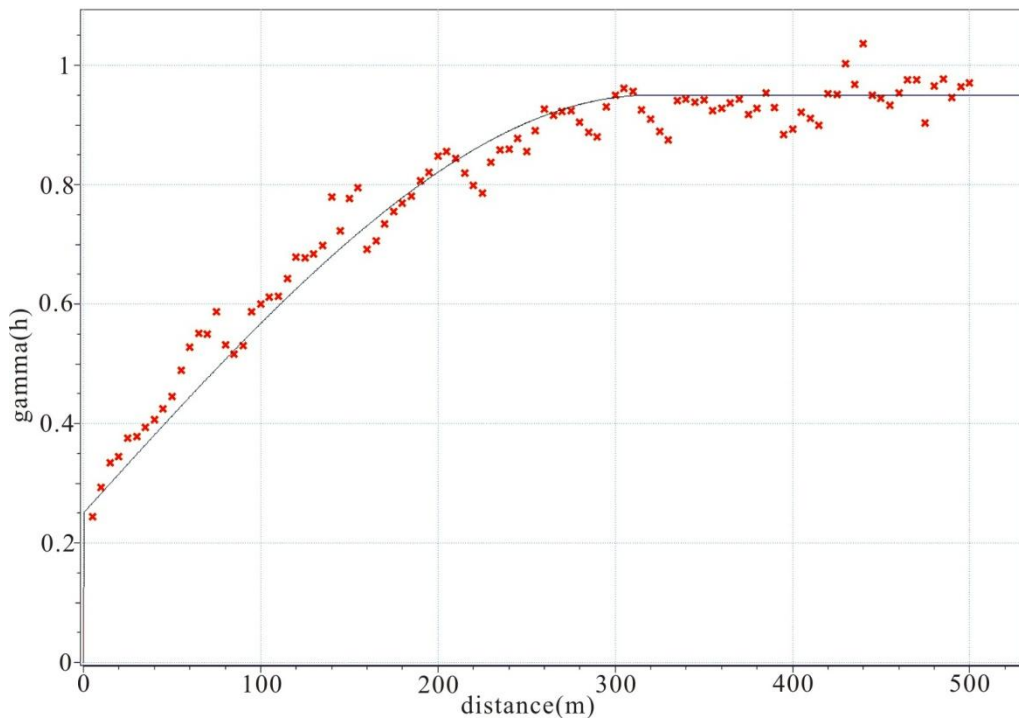

706  
707

**Fig. 6.**

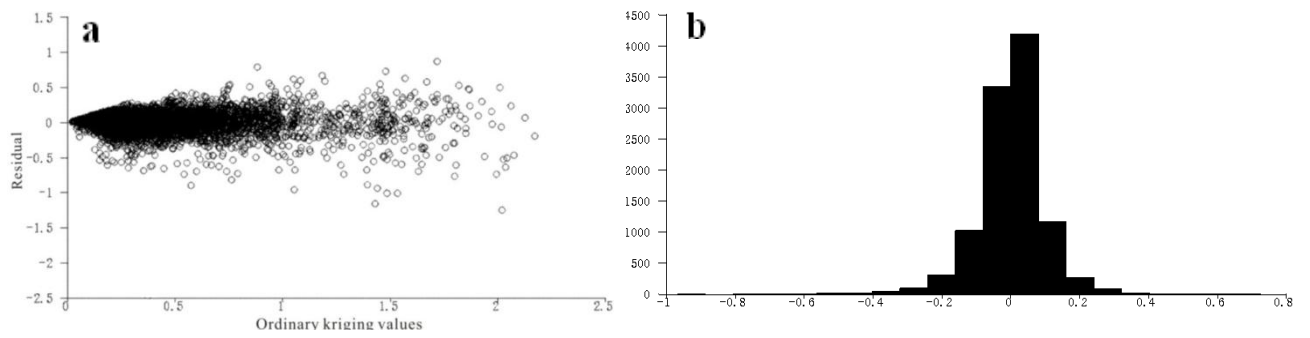

708  
709  
710  
711  
712  
713  
714

**Fig. 7.**

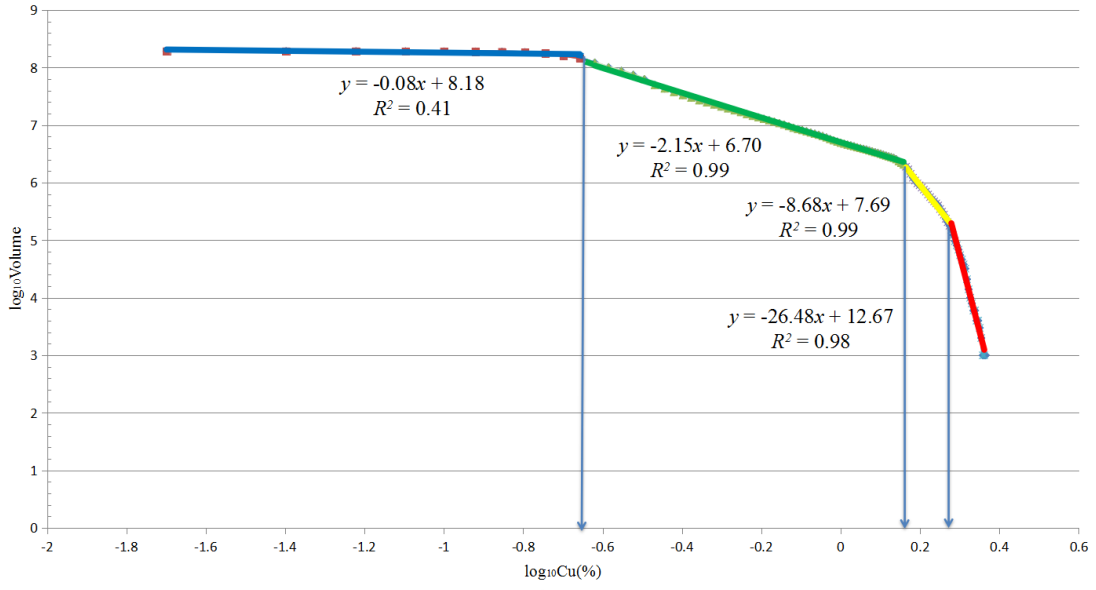

**Fig. 8.**

715

716

717

718

719

720

721

722

723

724

725

726

727

728

729

730

731

732

733

734

735

736

737 (a)

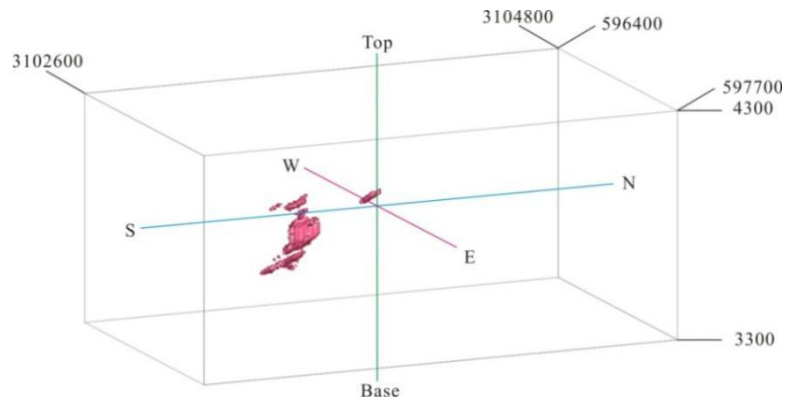

738

739 (b)

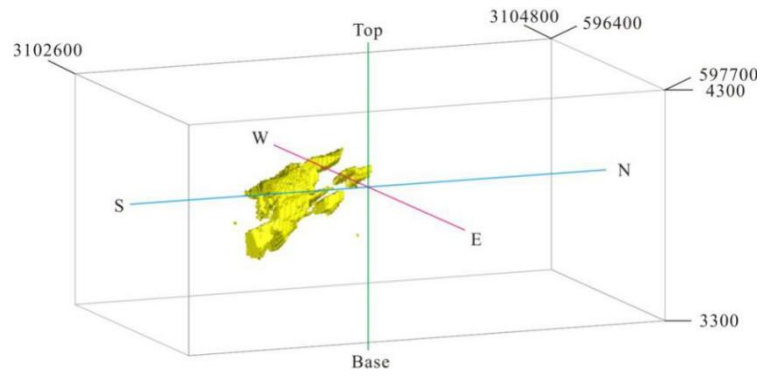

740

741 (c)

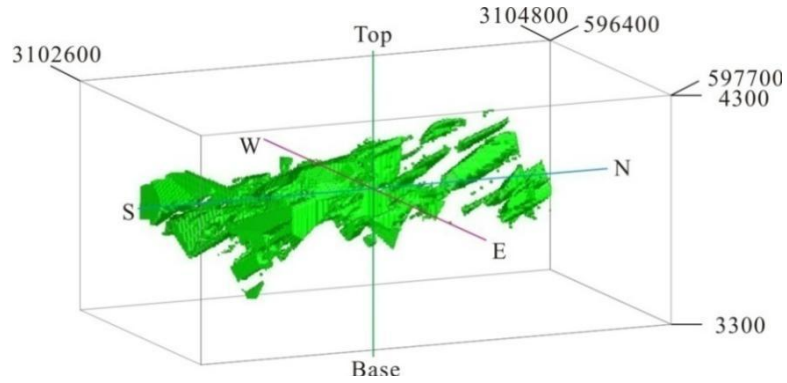

742

743 (d)

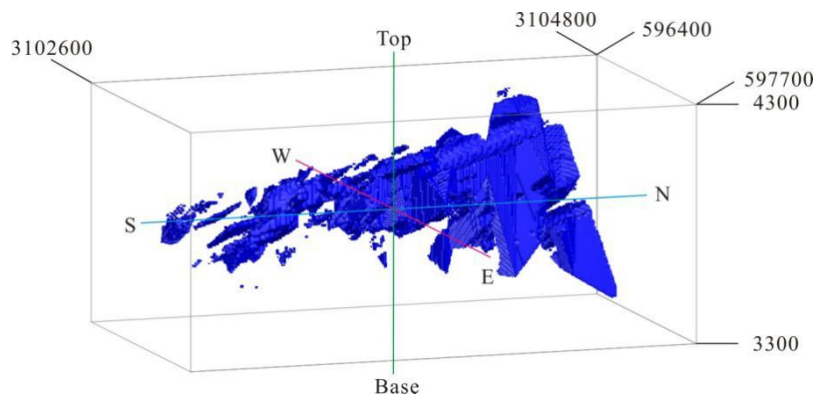

744

745

**Fig. 9.**

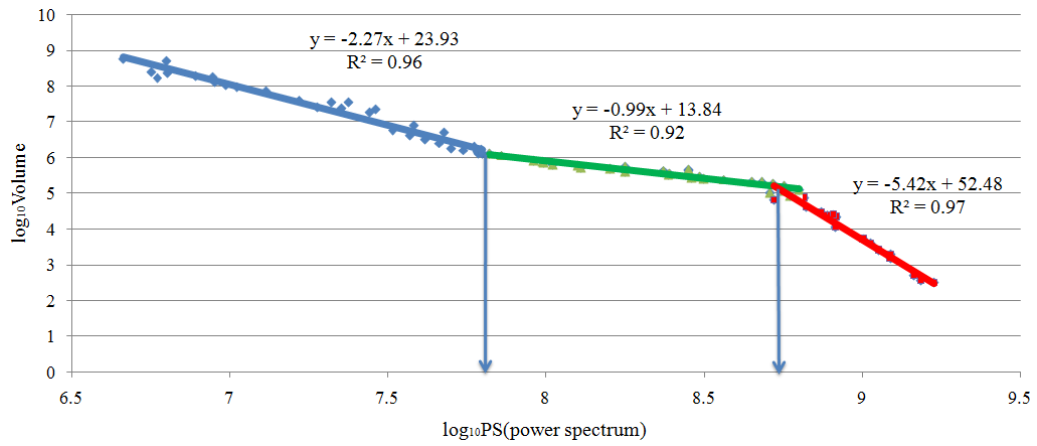

**Fig. 10.**

746

747

748 (a)

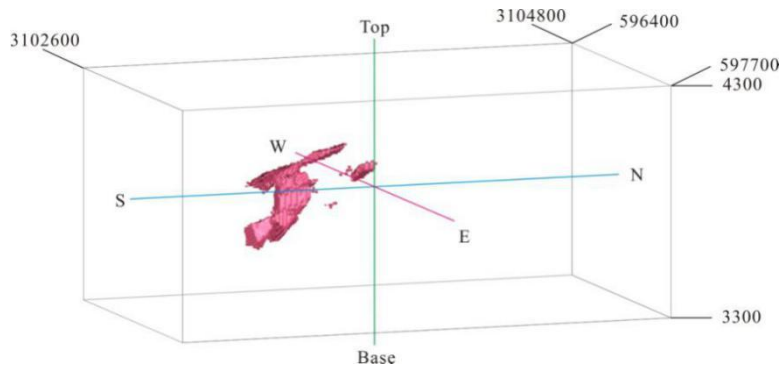

749

750 (b)

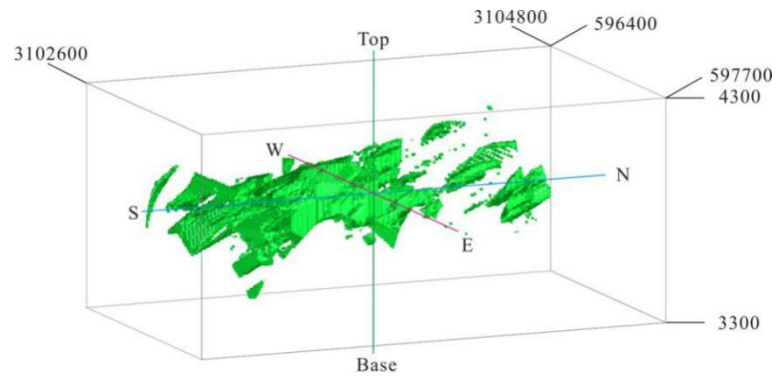

751

752 (c)

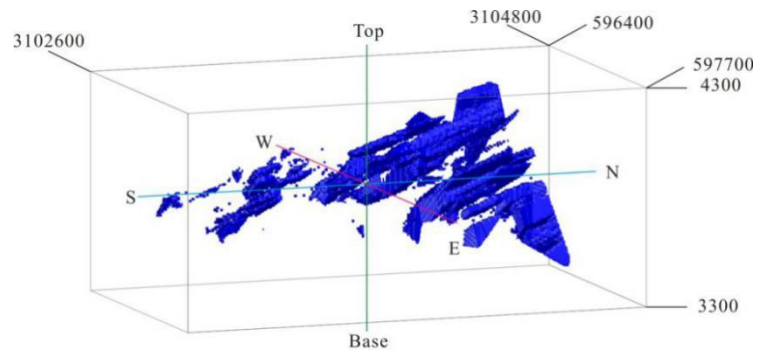

753

754

**Fig. 11.**

755 (a)

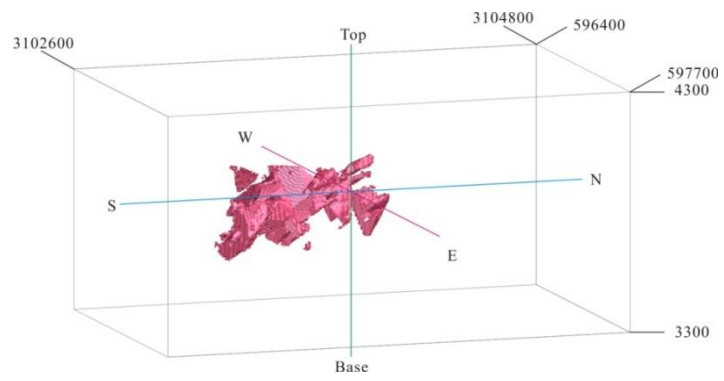

756

757 (b)

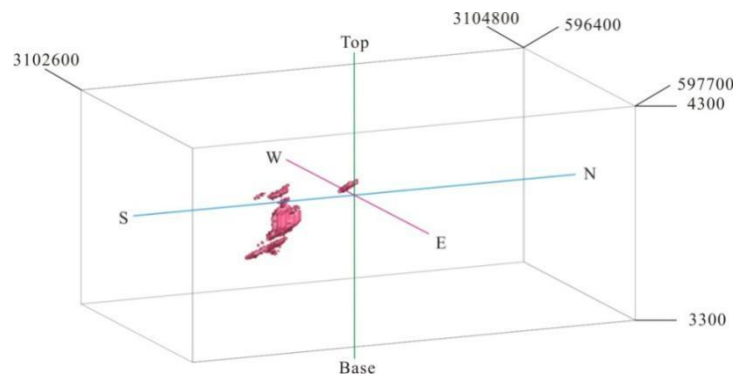

758

759 (c)

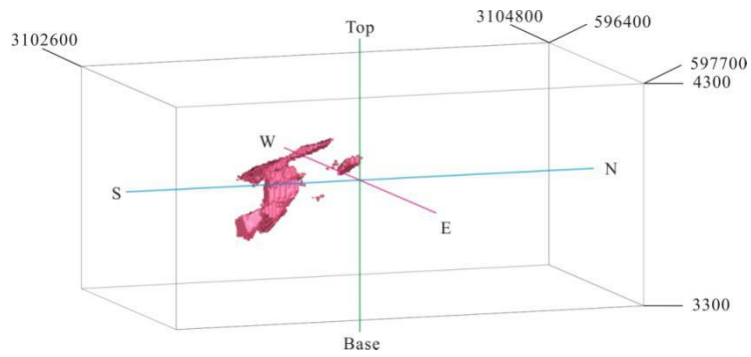

760

761

**Fig. 12.**

762

763

764

765

766

767

768

769

770 (a)

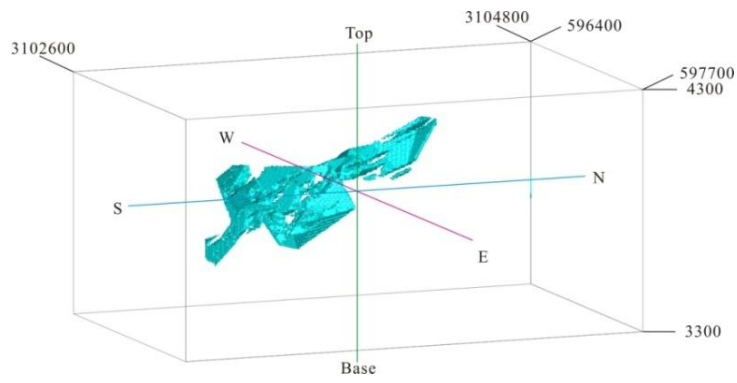

771

772 (b)

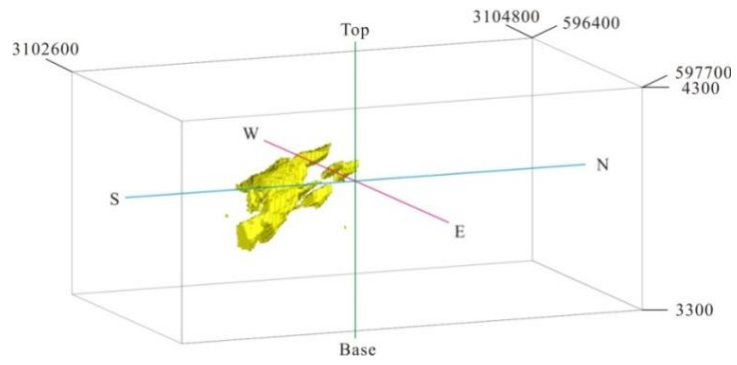

773

774 (c)

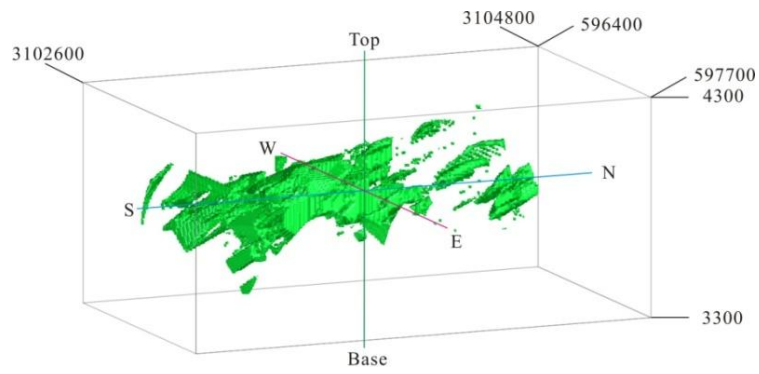

775

776

**Fig. 13.**

777

778

779

780

781

782

783

784

785  
786  
787  
788  
789  
790  
791  
792  
793  
794  
795  
796  
797  
798  
799  
800  
801  
802  
803  
804  
805  
806  
807  
808  
809  
810  
811  
812  
813  
814  
815  
816  
817  
818  
819  
820

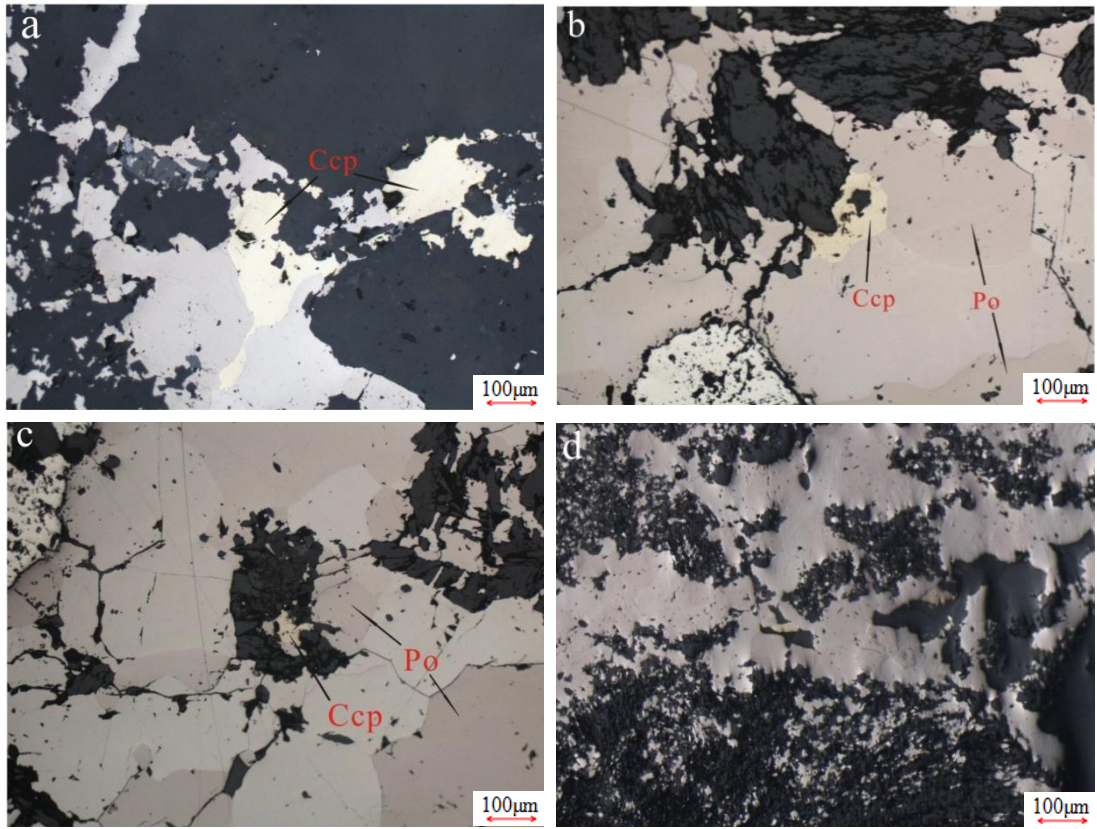

**Fig. 14.**



821 **Table 1**

| Variables          | Residual |
|--------------------|----------|
| Mean               | 0.000    |
| Variance           | 0.016    |
| Standard Deviation | 0.127    |

822 **Table 2**

| Mineralized zones      | Thresholds(Cu%) | Range(Cu%) |
|------------------------|-----------------|------------|
| Barren host rock       |                 | <0.25      |
| Weakly mineralized     | 0.25            | 0.25–1.38  |
| Moderately mineralized | 1.38            | 1.38–1.88  |
| Highly mineralized     | 1.88            | >1.88      |

823 **Table 3**

| Mineralized zones                 | PS threshold | Range of PS | Range(Cu%) |
|-----------------------------------|--------------|-------------|------------|
| leached zone and barren host rock |              | <7.81       | <0.23      |
| hypogene zones                    | 7.81         | 7.81-8.70   | 0.23-1.33  |
| supergene enrichment zones        | 8.70         | >8.70       | >1.33      |

824 **Table 4**

|               |              | Geological model                |                     |
|---------------|--------------|---------------------------------|---------------------|
|               |              | Inside zone                     | Outside zone        |
| Fractal model | Inside zone  | True positive (A)               | False positive (B)  |
|               | Outside zone | False negative (C)              | True negative (D)   |
|               |              | TypeIerror=C/(A+C)              | TypeIIerror=B/(B+D) |
|               |              | Overallaccuracy=(A+D)/(A+B+C+D) |                     |

825

826

827

828

829

830

831

832

833 **Table 5**

|                                                 |               | Potassic alteration of geological model |               |
|-------------------------------------------------|---------------|-----------------------------------------|---------------|
|                                                 |               | Inside zones                            | Outside zones |
| C–V fractal model of highly mineralized zones   | Inside zones  | A 2850                                  | B 1360        |
|                                                 | Outside zones | C 77927                                 | D 76913       |
|                                                 |               | T1E 0.96                                | T2E 0.02      |
|                                                 |               | OA                                      | 0.50          |
| S–V fractal model of supergene enrichment zones | Inside zones  | A 4131                                  | B 2318        |
|                                                 | Outside zones | C 73985                                 | D 74726       |
|                                                 |               | T1E 0.95                                | T2E 0.03      |
|                                                 |               | OA                                      | 0.52          |

834 **Table 6**

|                                                              |               | Phyllic alteration of geological model |               |
|--------------------------------------------------------------|---------------|----------------------------------------|---------------|
|                                                              |               | Inside zones                           | Outside zones |
| C–V fractal model of moderately and weakly mineralized zones | Inside zones  | A 36518                                | B 48027       |
|                                                              | Outside zones | C 25461                                | D 69155       |
|                                                              |               | T1E 0.41                               | T2E 0.40      |
|                                                              |               | OA                                     | 0.59          |
| S–V fractal model of the hypogene zones                      | Inside zones  | A 40080                                | B 44943       |
|                                                              | Outside zones | C 26899                                | D 54239       |
|                                                              |               | T1E 0.40                               | T2E 0.45      |
|                                                              |               | OA                                     | 0.56          |

835

836 **Table 7**

| Sample no. | Mineralized zones obtained by fractal models | Cu(%) |
|------------|----------------------------------------------|-------|
| PL-B74     | Weakly mineralized zones                     | 0.41  |
| PL-B62     | Moderately mineralized zones                 | 1.32  |
| PL-B82     | Highly mineralized zones                     | 1.80  |

837
